# Supplementary material for: High energy content bi- and mono-cycloalkane and iso-alkane jet blending mixtures derived from ethanol
Source: Royal Society of Chemistry journal article supplement (doi:10.1039/d5gc03955j), 2025-11-13
Supplement: d5gc03955j1.pdf [file d5gc03955j1.pdf]

## High energy content bi- and mono-cycloalkane and iso-alkane jet blending mixtures derived from ethanol

Robert A. Dagle<sup>a\*</sup>, Nickolas Riedel<sup>a</sup>, Zhibin Yang<sup>b</sup>, Johnny Saavedra Lopez<sup>a</sup>, Alia Cooper<sup>a</sup>,  
Michael Thorson<sup>a</sup>, Louis Edwards Caceres-Martinez<sup>c</sup>, Wan Tang Jeff Zhang<sup>c</sup>, Hilkka I.  
Kenttamaa<sup>d</sup>, Gozdem Kilaz<sup>c</sup>, Joshua Heyne<sup>a,b</sup>, and Ralph Gillespie<sup>e</sup>

<sup>a</sup> Energy and Environment Directorate, Pacific Northwest National Laboratory, 902 Battelle Blvd,  
Richland, WA 99354, United States

<sup>b</sup> Bioproduct, Sciences, and Engineering Laboratory, School of Engineering and Applied Science,  
Washington State University, Richland, WA 99354, USA

<sup>c</sup> School of Engineering Technology, Purdue University, 401 N. Grant Street, West Lafayette, IN  
47907, United States

<sup>d</sup> Department of Chemistry, Purdue University, 560 Oval Dr., West Lafayette, IN 47907, United  
States

<sup>e</sup> Downstream Technology Commercialization, LanzaTech, 8045 Lamon Avenue, Skokie, IL  
60077, United States

Supplemental Information

\*Corresponding author: robert.dagle@pnnl.gov

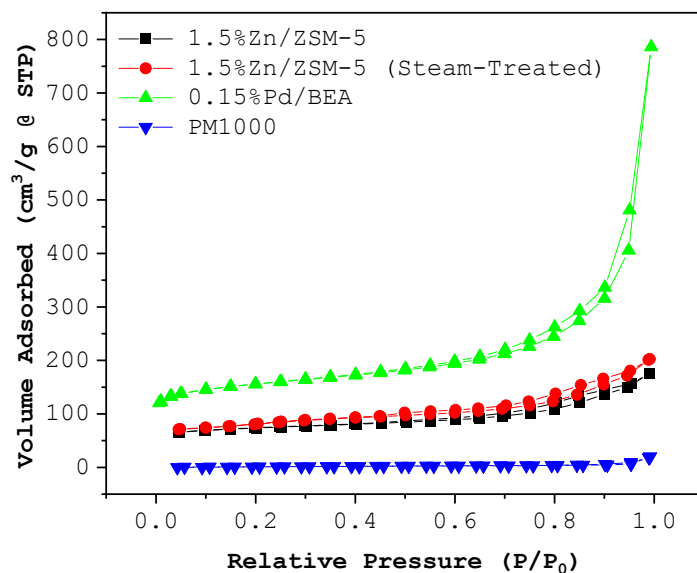

**Figure S1:** BET adsorption-desorption isotherms for the house-made catalysts in this study as well as the solid phosphoric acid catalyst from Clariant (PM1000).

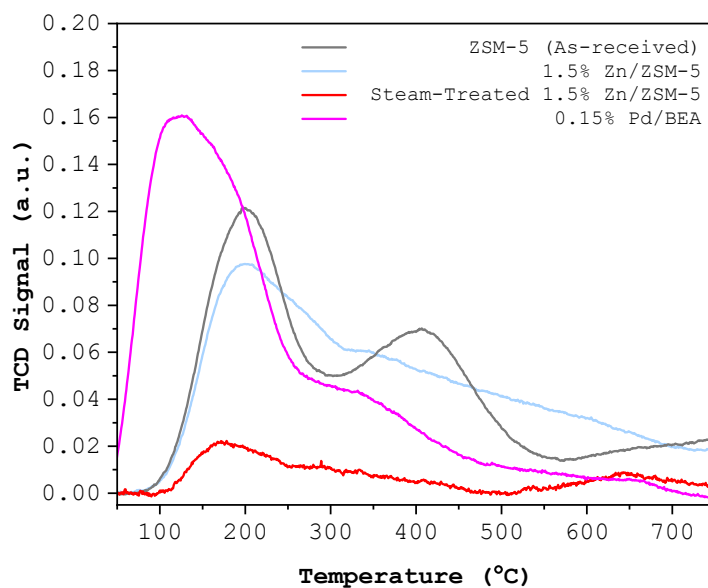

**Figure S2:**  $\text{NH}_3$ -TPD profiles where the TCD signal is normalized to the mass of sample.

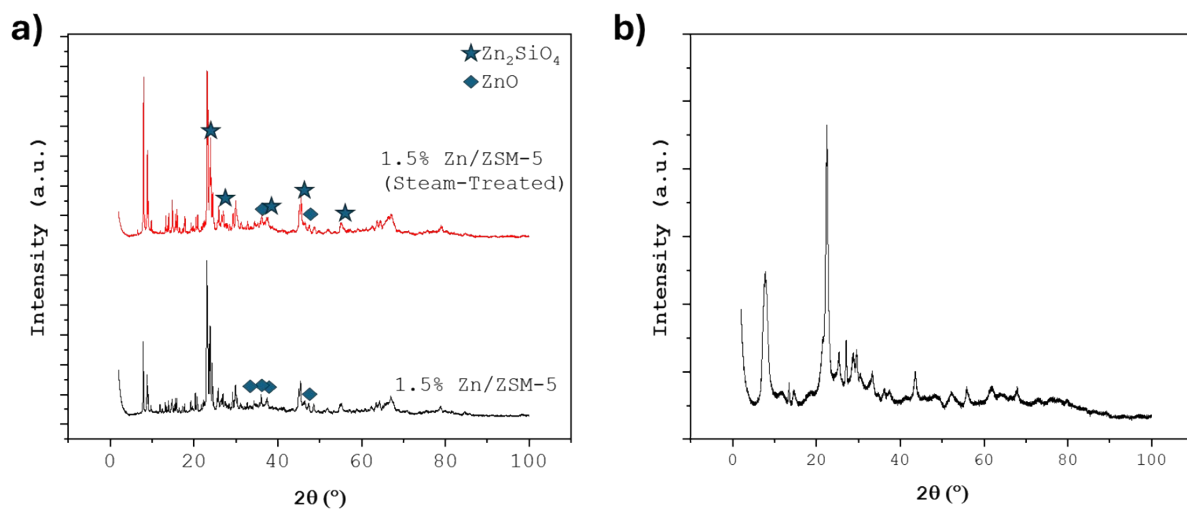

**Figure S3:** XRD diffractograms for the Zn/ZSM-5 before and after steam-treatment (a) and the Pd/Beta after ex-situ reduction (b). The authors note that there was no Pd detected by the XRD, with the visible peaks attributable only to the aluminosilicate framework of the zeolite.

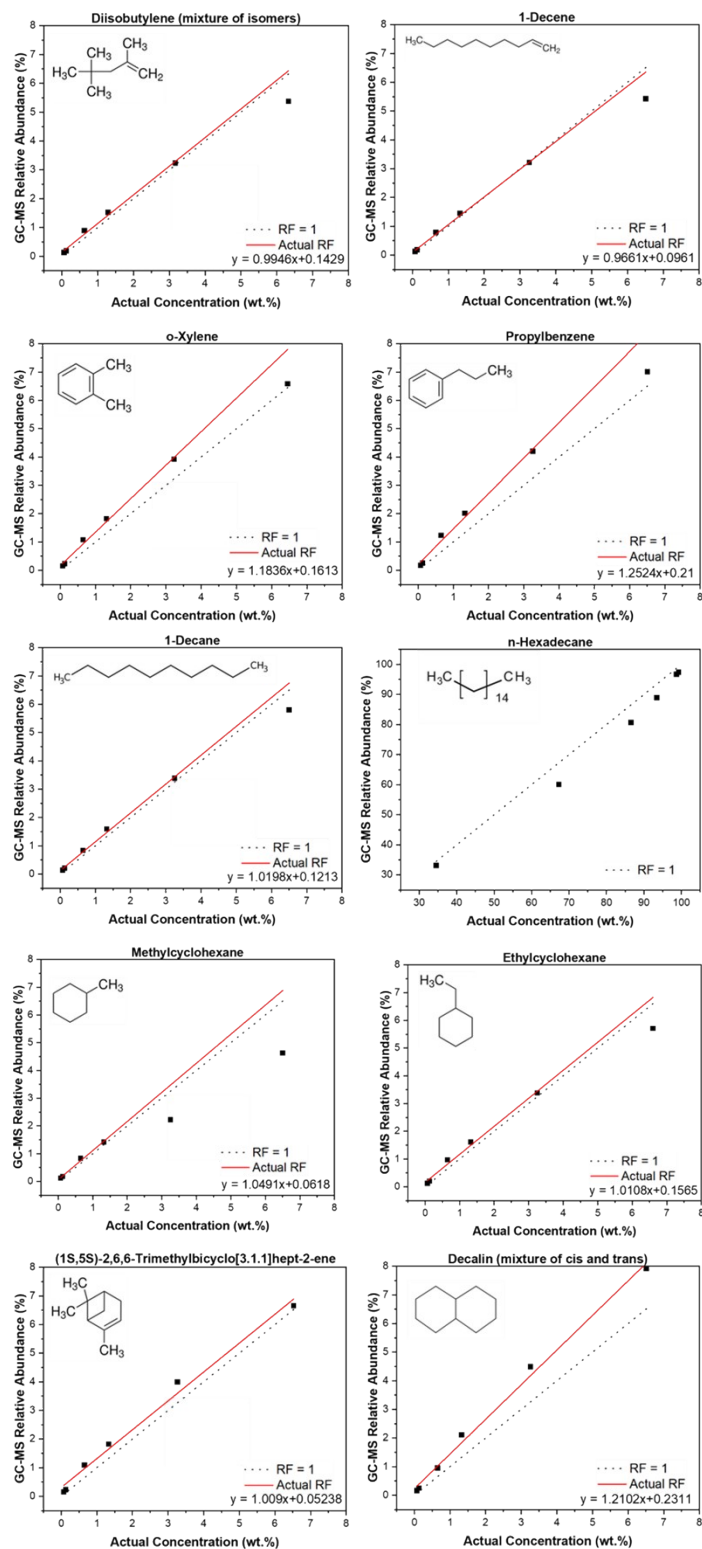

**Figure S4:** Comparison of actual GC-MS response factors for various model compounds versus a simple response factor of 1.

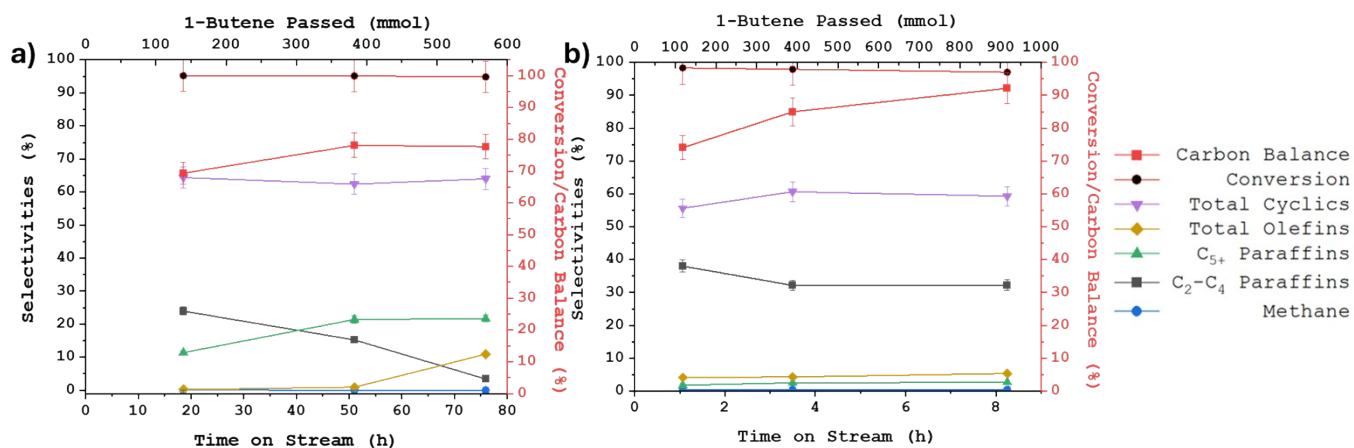

**Figure S5:** Selectivities to different hydrocarbon classes (left y-axes), butene conversion (right y-axes), and carbon balance (right y-axes) derived from micro GC (gas) and GC-MS (liquid) as a function of time on stream (bottom x-axis) and moles of 1-butene fed (top x-axis) for (a) butene aromatization over the hydrothermally treated 1.5%Zn/ZSM-5 at  $T = 340\text{ }^{\circ}\text{C}$ ,  $P = 350\text{ psig}$ , and  $\text{WHSV}_{1\text{-butene}} = 0.19\text{ h}^{-1}$  and (b) butene aromatization over the hydrothermally treated 1.5%Zn/ZSM-5 at  $T = 515\text{ }^{\circ}\text{C}$ ,  $P = 75\text{ psig}$ , and  $\text{WHSV}_{1\text{-butene}} = 2.8\text{ h}^{-1}$ .

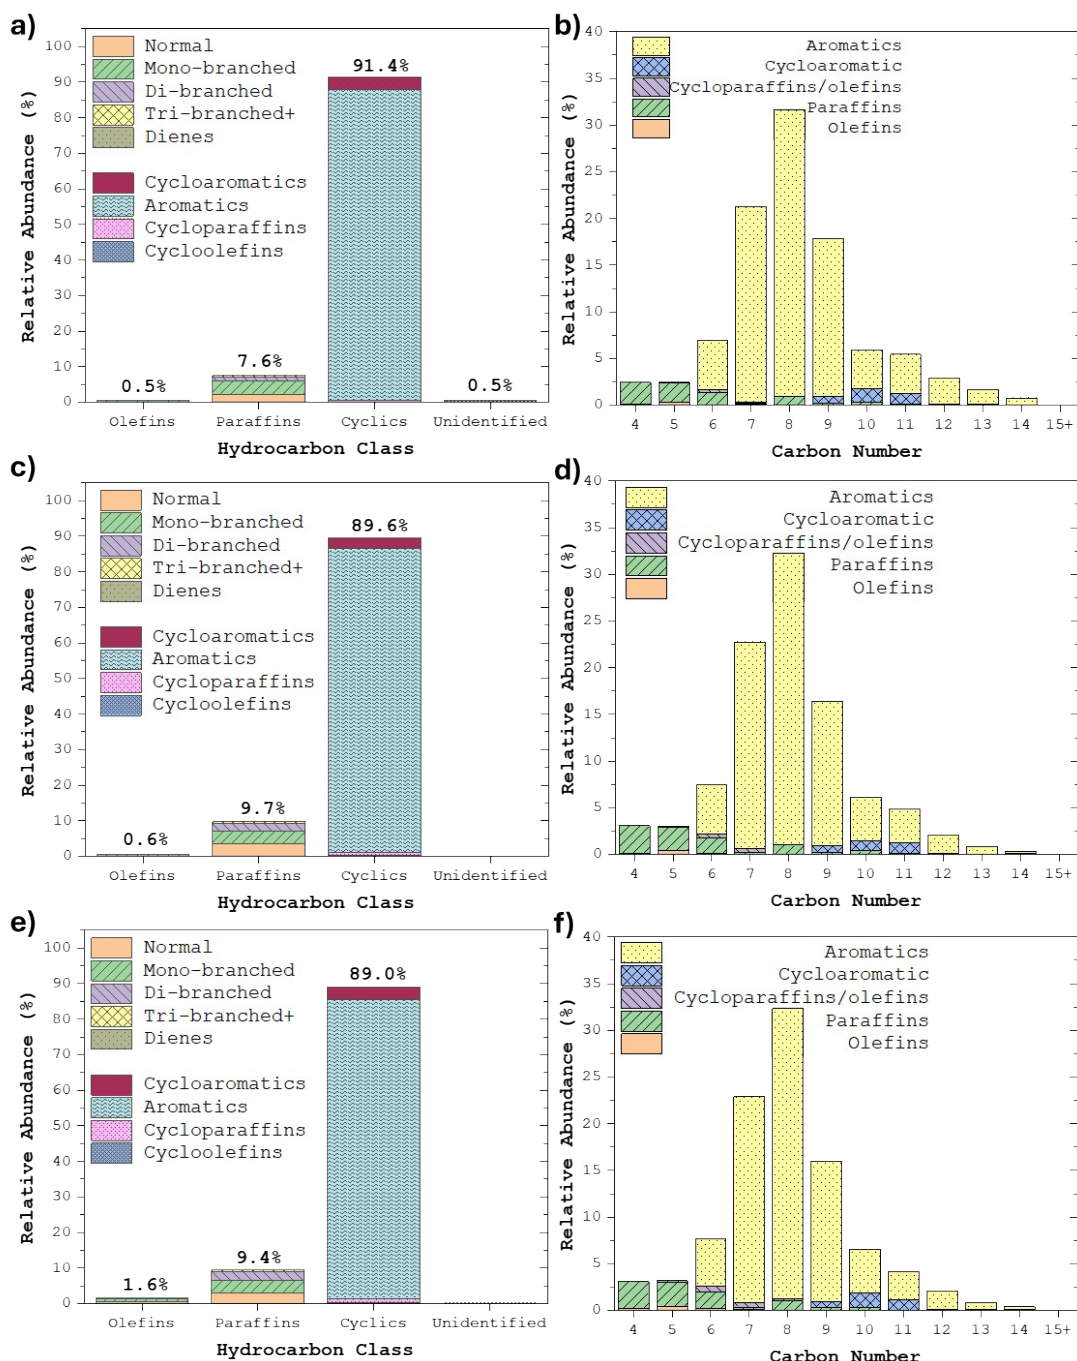

**Figure S6:** Conversion of Olig-1 intermediate, comprising a mixture of C<sub>4</sub>-C<sub>8</sub> olefins, over hydrothermally-treated 1.5%Zn/ZSM-5 (SiO<sub>2</sub>/Al<sub>2</sub>O<sub>3</sub> = 23) and resulting (a,c,e) liquid product classification and (b,d,f) carbon number distribution at (a,b) 1.3, (c,d) 3.4, and (e,f) 10 hours' time on stream (T=515°C, P=75 psig, WHSV = 2.8 h<sup>-1</sup>; Feed= 45 mol% Olig-1 in N<sub>2</sub>). "Olig-1" comprises of approximately 70% C<sub>4</sub>, 27% C<sub>6</sub>, and 3% C<sub>8</sub> acyclic olefins.

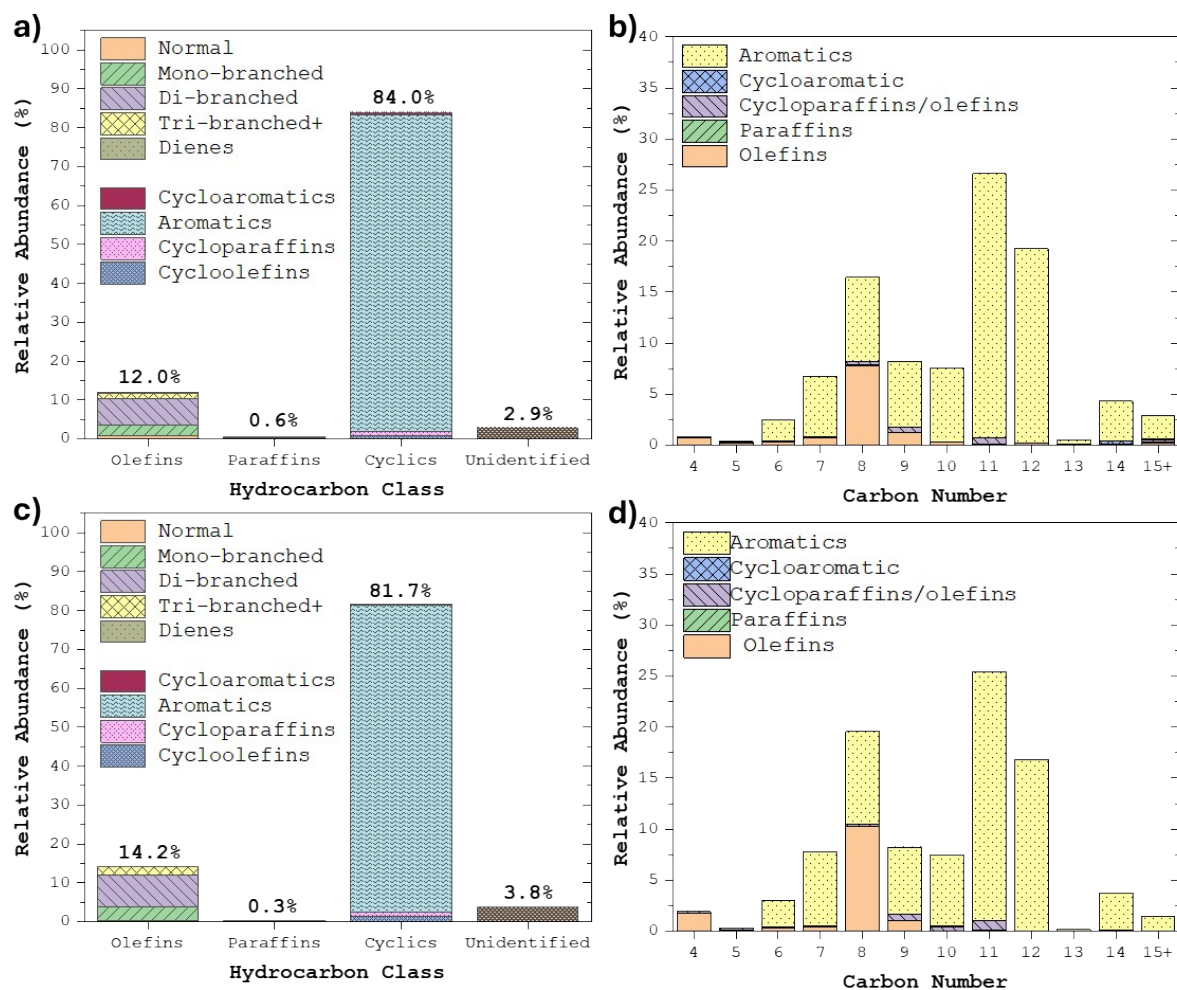

**Figure S7:** Conversion of butene aromatization product over Clariant PM1000 (SPA) and resulting liquid product classification and carbon number distribution at (a,b) 5.7 and (c,d) 17.7 time on stream ( $T=220^{\circ}\text{C}$ ,  $P=550$  psig,  $\text{WHSV}_{1\text{-butene}} = 0.5 \text{ h}^{-1}$ ,  $\text{WHSV}_{\text{Aromatics}} = 1 \text{ h}^{-1}$ ).



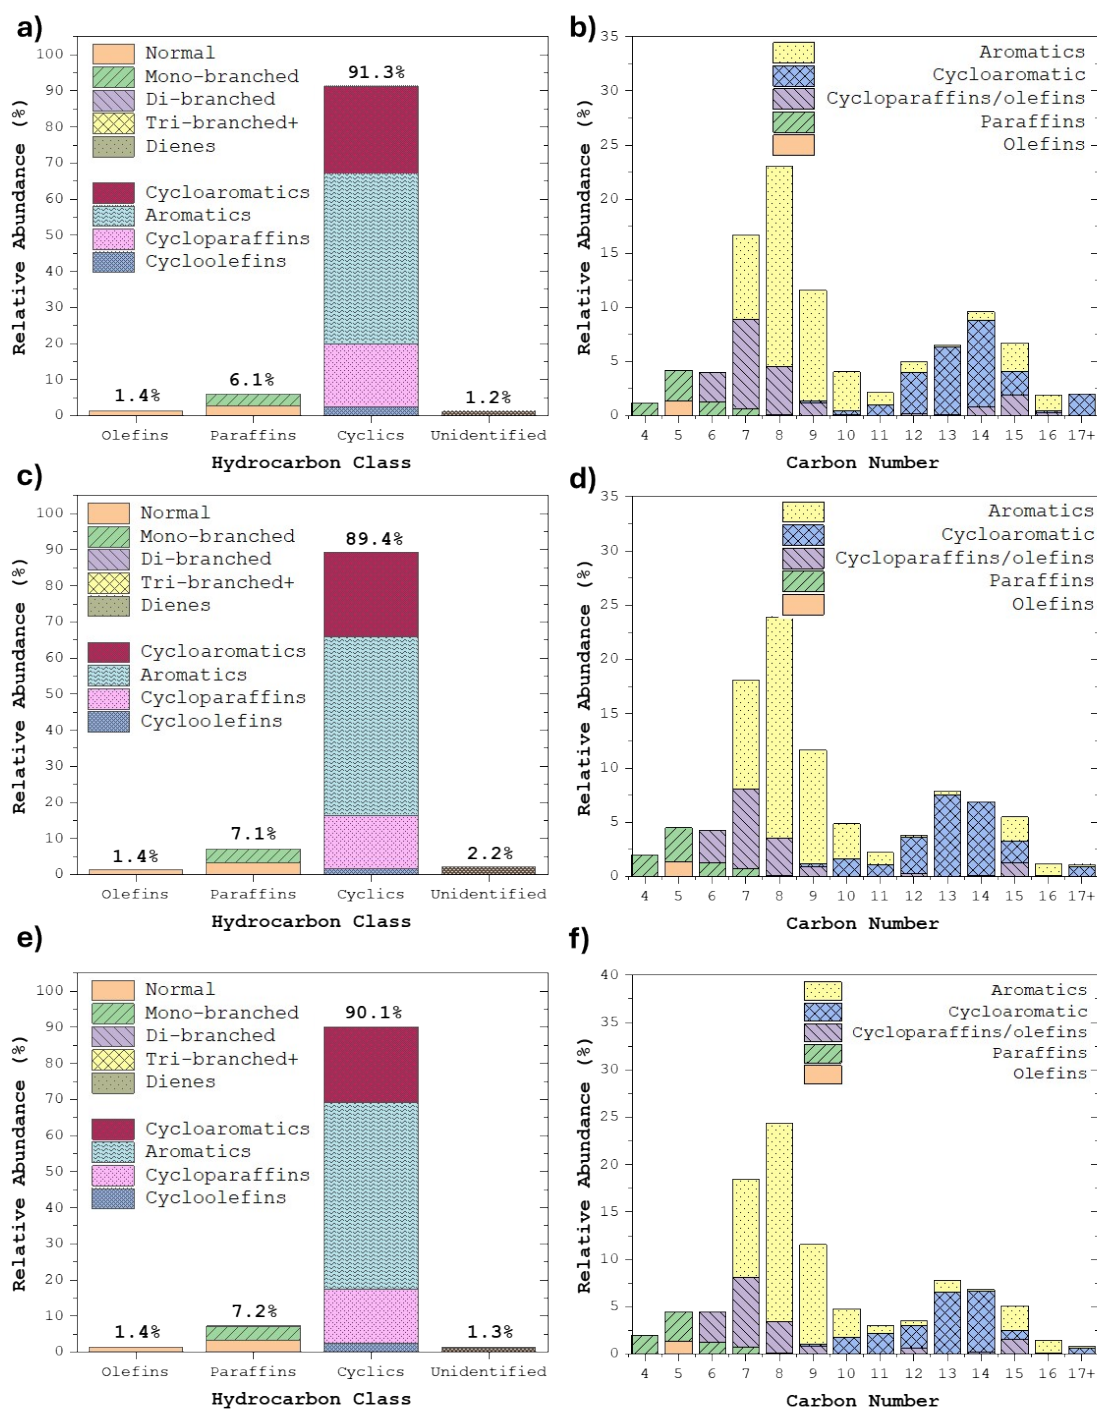

**Figure S8:** Conversion of hydroalkylated aromatic product over 0.15Pd/BEA and resulting (a,c,e) liquid product classification and (b,d,f) carbon number distribution at (a,b) 2, (c,d) 4, and (e,f) 6 hours' time on stream ( $T=140^{\circ}\text{C}$ ,  $P=270$  psig,  $\text{WHSV}_{\text{Aromatics}} = 2 \text{ h}^{-1}$ ).



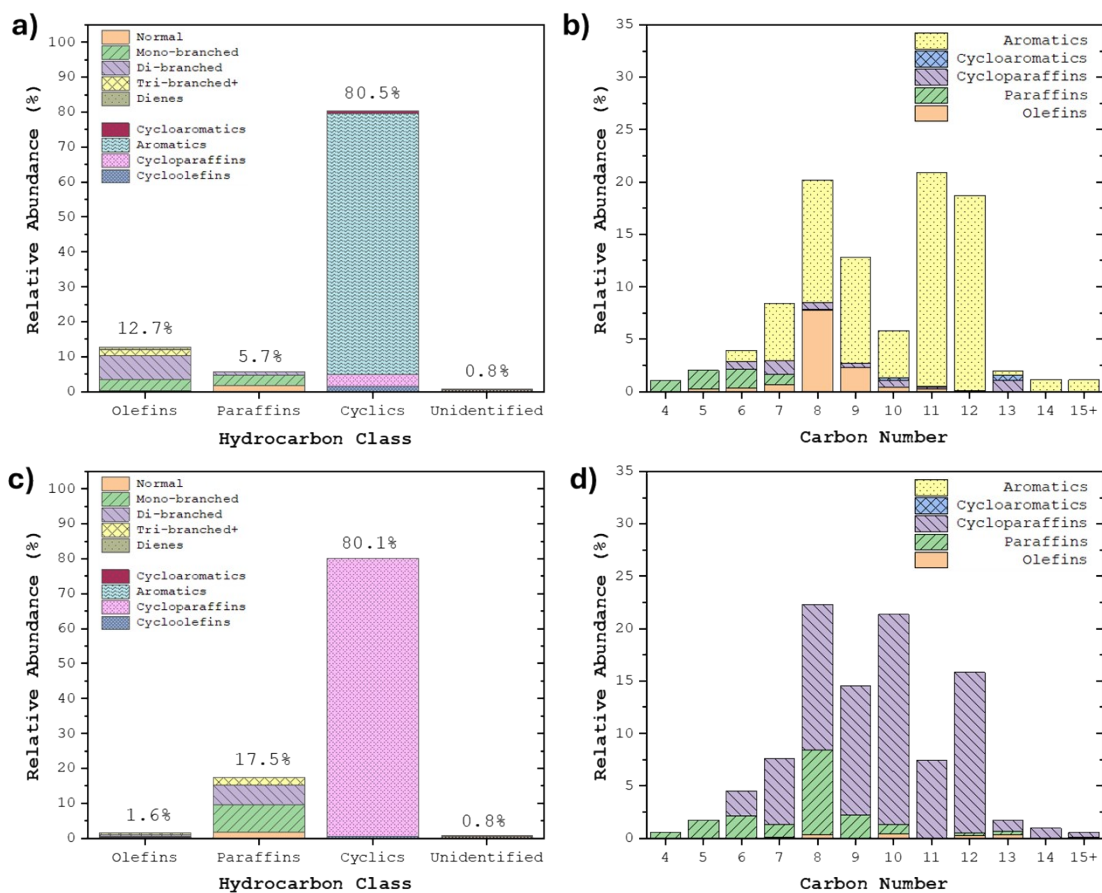

**Figure S9:** Comparison of the hydrocarbon class and carbon number distribution (from GC-MS) of the mono-cycloalkane-rich liquid product before (a,b) and after (c,d) hydrotreatment.

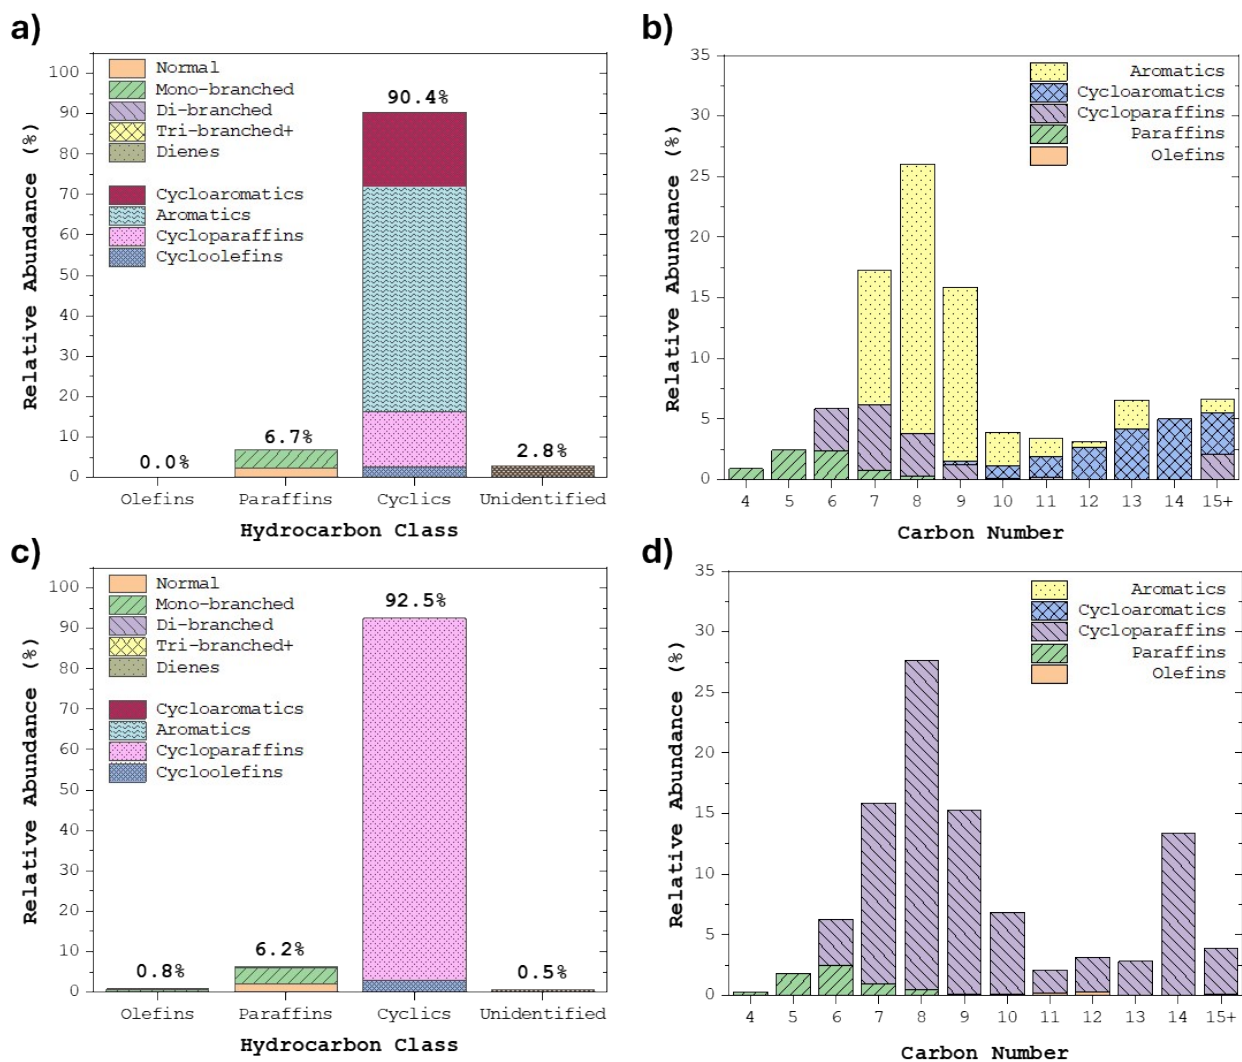

**Figure S10:** Comparison of the hydrocarbon class and carbon number distribution (from GC-MS) of the bicycloalkane-rich liquid product before (a,b) and after (c,d) hydrotreatment.

**Table S1:** Physicochemical properties of the catalysts evaluated in this work

| Catalyst                       | Surface Area           | Pore Size | Pore Volume             | Weak Acid Sites, (< 250 °C)  | Medium Acid Sites, (250 – 500°C) | Strong Acid Sites (> 500°C)  |
|--------------------------------|------------------------|-----------|-------------------------|------------------------------|----------------------------------|------------------------------|
|                                | <i>m<sup>2</sup>/g</i> | <i>Å</i>  | <i>cm<sup>3</sup>/g</i> | <i>mmol NH<sub>3</sub>/g</i> | <i>mmol NH<sub>3</sub>/g</i>     | <i>mmol NH<sub>3</sub>/g</i> |
| Clariant PolyMax 1000          | 5.2                    | 34.7      | 0.33                    | -                            | -                                | -                            |
| 1.5 Zn%/ZSM-5                  | 233                    | 14.0      | 0.20                    | 0.207                        | 0.238                            | 0.403                        |
| 1.5 Zn%/ZSM-5 (stream-treated) | 267                    | 34.2      | 0.20                    | 0.044                        | 0.073                            | 0.037                        |
| 0.15%Pd/BEA                    | 517                    | 9.1       | 1.12                    | 0.581                        | 0.356                            | Not detected                 |

**Table S2:** List of model compounds and their respective concentrations in a model mixture used to evaluate the response factors for different hydrocarbon classes in our GC-MS. This mother mixture was diluted 2x, 5x, 10x, 50x, and 100x with excess n-hexadecane to achieve the different concentrations shown in Figure S7.

| Species                                         | Mass Composition (%) |
|-------------------------------------------------|----------------------|
| n-Hexadecane                                    | 34.504%              |
| Methylcyclohexane                               | 6.503%               |
| Ethylcyclohexane                                | 6.599%               |
| Propylbenzene                                   | 6.509%               |
| Dimethylnaphthalene                             | 6.343%               |
| 1-Decene                                        | 6.514%               |
| (1S,5S)-2,6,6-Trimethylbicyclo[3.1.1]hept-2-ene | 6.526%               |
| Decahydronaphthalene                            | 6.514%               |
| n-Decane                                        | 6.502%               |
| Diisobutylene                                   | 7.030%               |
| o-Xylene                                        | 6.454%               |

**Table S3:** Primary components identified in the liquid hydrocarbon product following the *alkylation* of aromatics with butene—prior to hydrotreatment—as depicted in Figure 5c and Figure 5d.

| Product Number | Most Abundant <u>Liquid</u> Products                                                                                         | Relative Abundance* | Most Abundant <u>Jet-Range</u> Products                                                                                       | Relative Abundance* |
|----------------|------------------------------------------------------------------------------------------------------------------------------|---------------------|-------------------------------------------------------------------------------------------------------------------------------|---------------------|
| 1              | 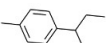<br>1-methyl-4-(1-methylpropyl)-benzene     | 16.25               | <br>1-methyl-4-(1-methylpropyl)-benzene     | 16.25               |
| 2              | <br>2,4-dimethyl-1-(1-methylpropyl)-benzene | 8.28                | <br>2,4-dimethyl-1-(1-methylpropyl)-benzene | 8.28                |
| 3              | <br>Toluene                                 | 7.23                | <br>(1-methylpropyl)-benzene                | 5.45                |
| 4              | <br>p-Xylene                                | 6.78                | <br>4-tert-butyltoluene                     | 4.30                |
| 5              | <br>(1-methylpropyl)-benzene              | 5.45                | <br>1,2,3-trimethyl-benzene               | 2.66                |
| 6              | <br>4-tert-butyltoluene                   | 4.30                | <br>1-ethyl-3-methyl-benzene              | 1.86                |
| 7              | <br>1,2,3-trimethyl-benzene               | 2.66                | <br>2-methyl-1-propyl-naphthalene         | 1.74                |
| 8              | <br>Benzene                               | 2.52                | <br>2-tert-butyltoluene                   | 1.56                |
| 9              | <br>1-ethyl-3-methyl-benzene              | 1.86                | <br>4-tert-butyl-o-xylene                 | 1.56                |
| 10             | <br>2-methyl-1-propyl-naphthalene         | 1.74                | <br>2-methyl-naphthalene                  | 1.44                |

\*% of total analyzed chromatographic area

**Table S4:** Primary components identified in the liquid hydrocarbon product following the *hydroalkylation* of aromatics—prior to hydrotreatment—as depicted in Figure 6c and Figure 6d.

| Product Number | Most Abundant <u>Liquid</u> Products                                                                                    | Relative Abundance* | Most Abundant <u>Jet-Range</u> Products                                                                                                    | Relative Abundance* |
|----------------|-------------------------------------------------------------------------------------------------------------------------|---------------------|--------------------------------------------------------------------------------------------------------------------------------------------|---------------------|
| 1              | 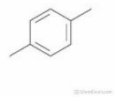<br>p-Xylene                           | 14.90               | <br>1-cyclohexyl-3-methyl-benzene                        | 5.46                |
| 2              | <br>Toluene                            | 10.41               | <br>1-ethyl-3-methyl-benzene                             | 5.30                |
| 3              | <br>Methylcyclohexane                  | 6.24                | <br>1,4-dimethyl-2-cyclohexylbenzene                     | 2.37                |
| 4              | <br>1-cyclohexyl-3-methyl-benzene     | 5.46                | <br>1,2,3-trimethyl-benzene                             | 2.19                |
| 5              | <br>1-ethyl-3-methyl-benzene         | 5.30                | <br>1,2,3,4-tetrahydro-3-isopropyl-5-methylnaphthalene | 1.98                |
| 6              | <br>o-Xylene                         | 3.94                | <br>1-ethyl-2-methyl-benzene                           | 1.68                |
| 7              | <br>1,4-dimethyl-2-cyclohexylbenzene | 2.37                | <br>1,2,3,3a-tetrahydroazulene                         | 1.20                |

|    |                                                                                                             |      |                                                                                                                                   |      |
|----|-------------------------------------------------------------------------------------------------------------|------|-----------------------------------------------------------------------------------------------------------------------------------|------|
| 8  | 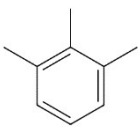<br>1,2,3-trimethylbenzene | 2.19 | <br>1,2,3,4-tetrahydro-2,7-dimethyl-naphthalene | 0.85 |
| 9  | <br>Cyclohexane            | 2.11 | <br>1,2,3,4-tetrahydro-6-butyl-naphthalene      | 0.79 |
| 10 | <br>Ethylbenzene           | 2.06 | <br>1-methyl-3-propyl-benzene                   | 0.77 |

\*% of total analyzed chromatographic area



**Table S5:** Idealized reaction steps for ethanol conversion to representative C<sub>16</sub> hydrocarbons: acyclic, monocyclic (cycloalkane), and bicyclic (fused and non-fused) alkanes.

| Reaction Name                                                 | Idealized Reaction                                 | Equation |
|---------------------------------------------------------------|----------------------------------------------------|----------|
| <b>Acyclic Alkane</b>                                         |                                                    |          |
| Ethanol Dehydration                                           | $C_2H_5OH \rightarrow C_2H_4 + H_2O$               | 1        |
| Ethanol Dimerization                                          | $2C_2H_4 \rightarrow C_4H_8$                       | 2        |
| Butene Oligomerization                                        | $4C_4H_8 \rightarrow C_{16}H_{32}$                 | 3        |
| Hydrogenation of Olefins                                      | $C_{16}H_{32} + H_2 \rightarrow C_{16}H_{34}$      | 4        |
| <b>Idealized Net Reaction to C<sub>16</sub>H<sub>34</sub></b> | $8C_2H_5OH + H_2 \rightarrow C_{16}H_{34} + 8H_2O$ | 5        |
| <b>One-ring cycloalkane</b>                                   |                                                    |          |
| Ethanol Dehydration                                           | $C_2H_5OH \rightarrow C_2H_4 + H_2O$               | 1        |
| Ethanol Dimerization                                          | $2C_2H_4 \rightarrow C_4H_8$                       | 2        |
| Butene Aromatization                                          | $2C_4H_8 \rightarrow C_8H_{10} + 3H_2$             | 6        |
| Alkylation of Aromatics with Butene                           | $2C_4H_8 + C_8H_{10} \rightarrow C_{16}H_{26}$     | 7        |
| Hydrogenation of Aromatics and Olefins                        | $C_{16}H_{26} + 4H_2 \rightarrow C_{16}H_{32}$     | 8        |
| <b>Idealized Net Reaction to C<sub>16</sub>H<sub>32</sub></b> | $8C_2H_5OH \rightarrow C_{16}H_{32} + 8H_2O$       | 9        |
| <b>Two-ring cycloalkanes (fused or non-fused)</b>             |                                                    |          |
| Ethanol Dehydration                                           | $C_2H_5OH \rightarrow C_2H_4 + H_2O$               | 1        |
| Ethanol Dimerization                                          | $2C_2H_4 \rightarrow C_4H_8$                       | 2        |
| Butene Aromatization                                          | $2C_4H_8 \rightarrow C_8H_{10} + 3H_2$             | 6        |
| Hydroalkylation of Aromatics                                  | $2C_8H_{10} + 2H_2 \rightarrow C_{16}H_{24}$       | 10       |
| Hydrogenation of Aromatics and Olefins                        | $C_{16}H_{24} + 3H_2 \rightarrow C_{16}H_{30}$     | 11       |
| <b>Idealized Net Reaction to C<sub>16</sub>H<sub>30</sub></b> | $8C_2H_5OH \rightarrow C_{16}H_{30} + 8H_2O + H_2$ | 12       |

**Table S6:** Summary of process conditions and approximate carbon efficiencies of the various steps in the butene to cycloparaffin-rich aviation fuel process.

| Catalytic Step           | Conversion (%)    | Catalyst                                 | Conditions                                                                                                                    | Carbon Yield (%) | Reference                |
|--------------------------|-------------------|------------------------------------------|-------------------------------------------------------------------------------------------------------------------------------|------------------|--------------------------|
| Butene Aromatization     | 97                | Hydrothermally Treated<br>1.5% Zn/ZSM-5  | T = 515 °C<br>P = 75 psig<br>WHSV = 2.8 h <sup>-1</sup>                                                                       | 40               | This work, Fig. S5b      |
| Alkylation with 1-Butene | ~100 <sup>a</sup> | Clariant PM1000<br>Solid Phosphoric Acid | T = 220 °C<br>P = 550 psig<br>WHSV <sub>1-butene</sub> = 0.5 h <sup>-1</sup><br>WHSV <sub>Aromatics</sub> = 1 h <sup>-1</sup> | 92 <sup>b</sup>  | This work, Fig. 5 & S7   |
| Hydroalkylation          | 48 <sup>c</sup>   | 0.15% Pd/BEA                             | T = 140 °C<br>P = 270 psig<br>H <sub>2</sub> /Aromatic Ratio = 1/1<br>WHSV = 2 h <sup>-1</sup>                                | 76 <sup>d</sup>  | This work, Fig. 6 & S8   |
| Hydrotreatment           | ~99 <sup>e</sup>  | BASF Ni 5300 E                           | T = 180 °C<br>P = 700 psig<br>WHSV <sub>feed</sub> = 1 h <sup>-1</sup>                                                        | ~97 <sup>f</sup> | This work, Fig. S9 & S10 |

<sup>a</sup> Conversion of 1- butene co-feed; less than 0.5 vol.% n-butene was observed in the gas samples, though we acknowledge that small amount of butene could initially be dissolved in the pressurized liquid trap and immediately lost to the air during liquid sampling.

<sup>b</sup> Estimated from GC-MS results; primary loss in carbon efficiency due to butene dimerization to C<sub>8</sub> olefins.

<sup>c</sup> Conversion of BTX only, estimated from GC-MS results; we assume that benzene, toluene, and xylenes are the only molecules that are active for hydroalkylation.

<sup>d</sup> The main undesired species are over-hydrogenation species, i.e. cyclohexane, methylcyclohexane, and trimethylcyclohexanes. Minimal concentrations of heavier-than-jet species were detected.

<sup>e</sup> Conversion olefins and aromatics to saturated to paraffins and cycloparaffins respectively (see Figures S9 and S10).

<sup>f</sup> Carbon yield of olefin and aromatics (Figures S9 and S10) to desired alkane and cycloalkane products. Undesired products include light alkanes derived from larger molecular weight hydrocarbons.
